# Supplementary material for: Dynamic action of the Sec machinery during initiation, protein translocation and termination
Source: eLife journal article supplement (doi:10.7554/elife.35112), 2018-06-07
Supplement: supp [file elife_poa_e35112_Figure_2_figure_supplement_3.pdf › elife_poa_e35112_Figure_2_figure_supplement_3.pdf]

Time (s)

# of donor and acceptor photons

Fluorescence photon count time trace

compute  $E1$  and  $E2$

if  $\Delta t < \text{time window}$   
add point to  $(E1, E2)$  bin

2D FRET efficiency histogram

$E2$

$E1$

$(E1, E2)$  bin

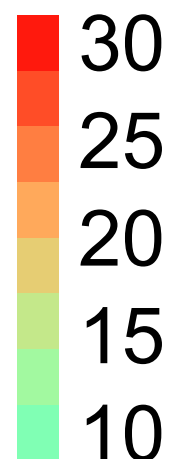

Figure 2 - figure supplement 3
