# Supplementary figures and images for: Dynamic action of the Sec machinery during initiation, protein translocation and termination
Source: eLife journal article supplement (doi:10.7554/elife.35112), 2018-06-07

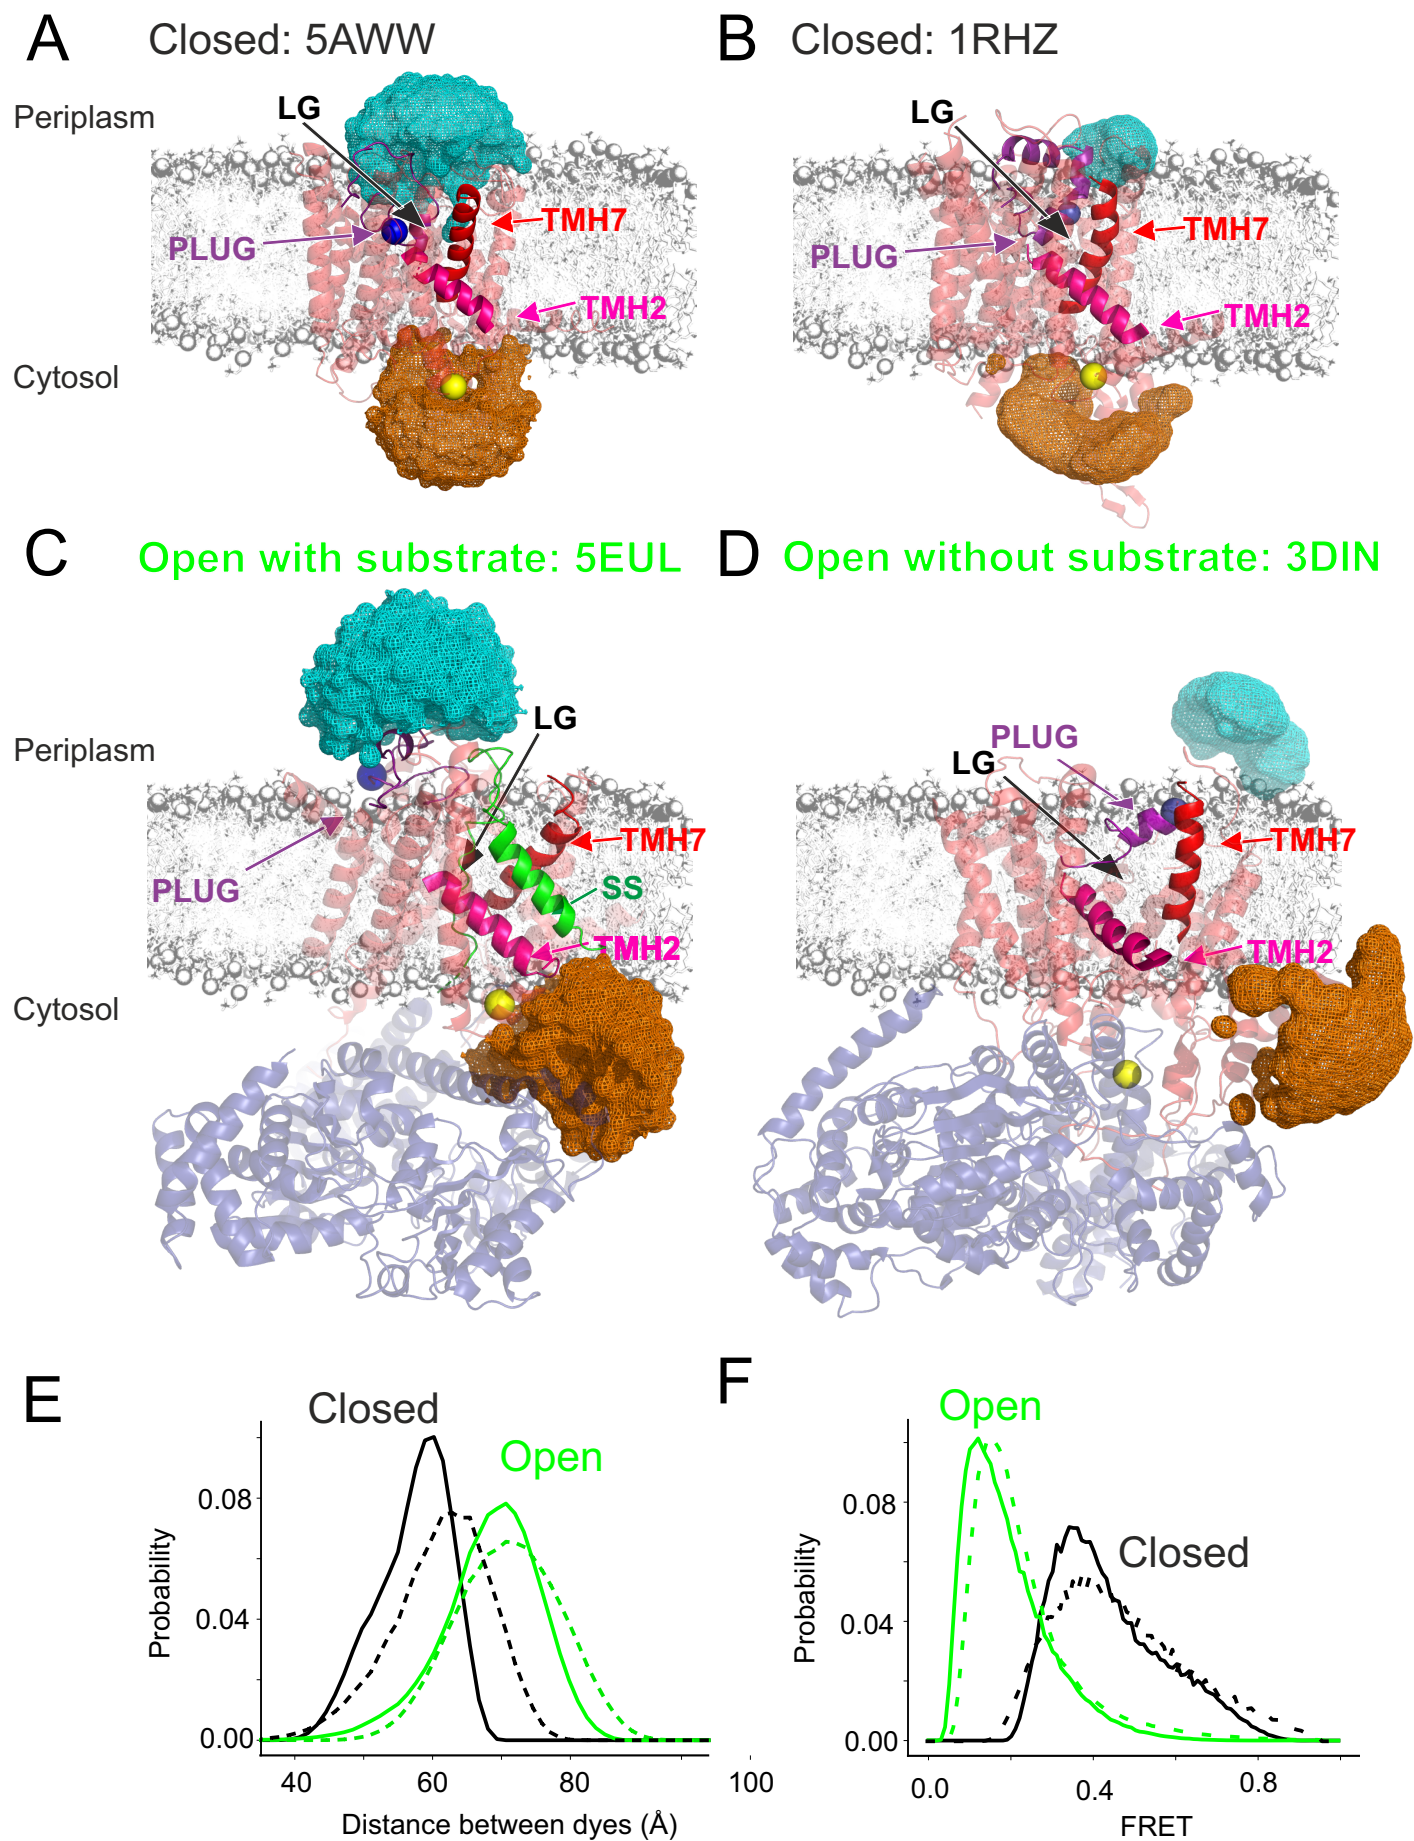

Figure 1 - figure supplement 1

Supplement: supp [file elife_poa_e35112_Figure_1_figure_supplement_1.pdf › elife_poa_e35112_Figure_1_figure_supplement_1.pdf]

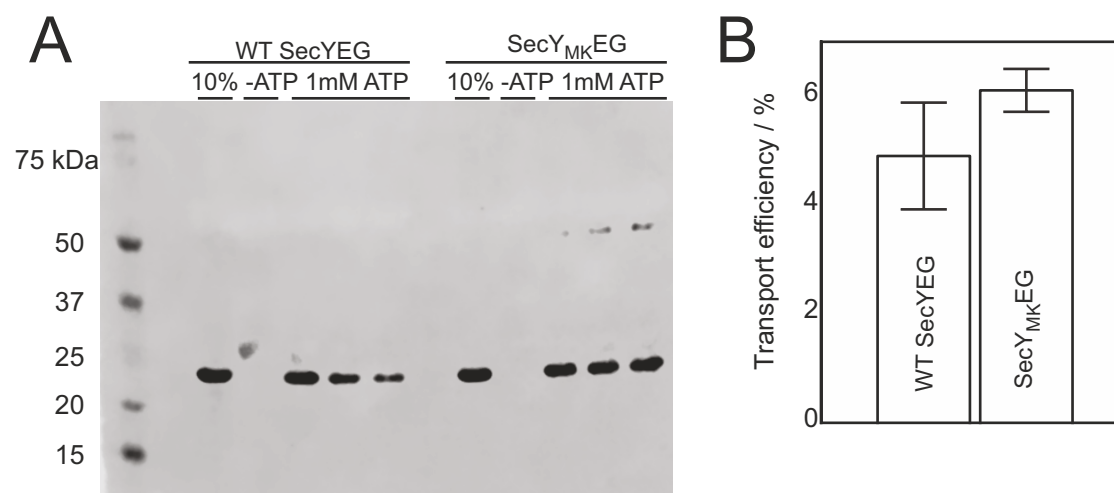

Figure 1 - figure supplement 2

Supplement: supp [file elife_poa_e35112_Figure_1_figure_supplement_2.pdf › elife_poa_e35112_Figure_1_figure_supplement_2.pdf]

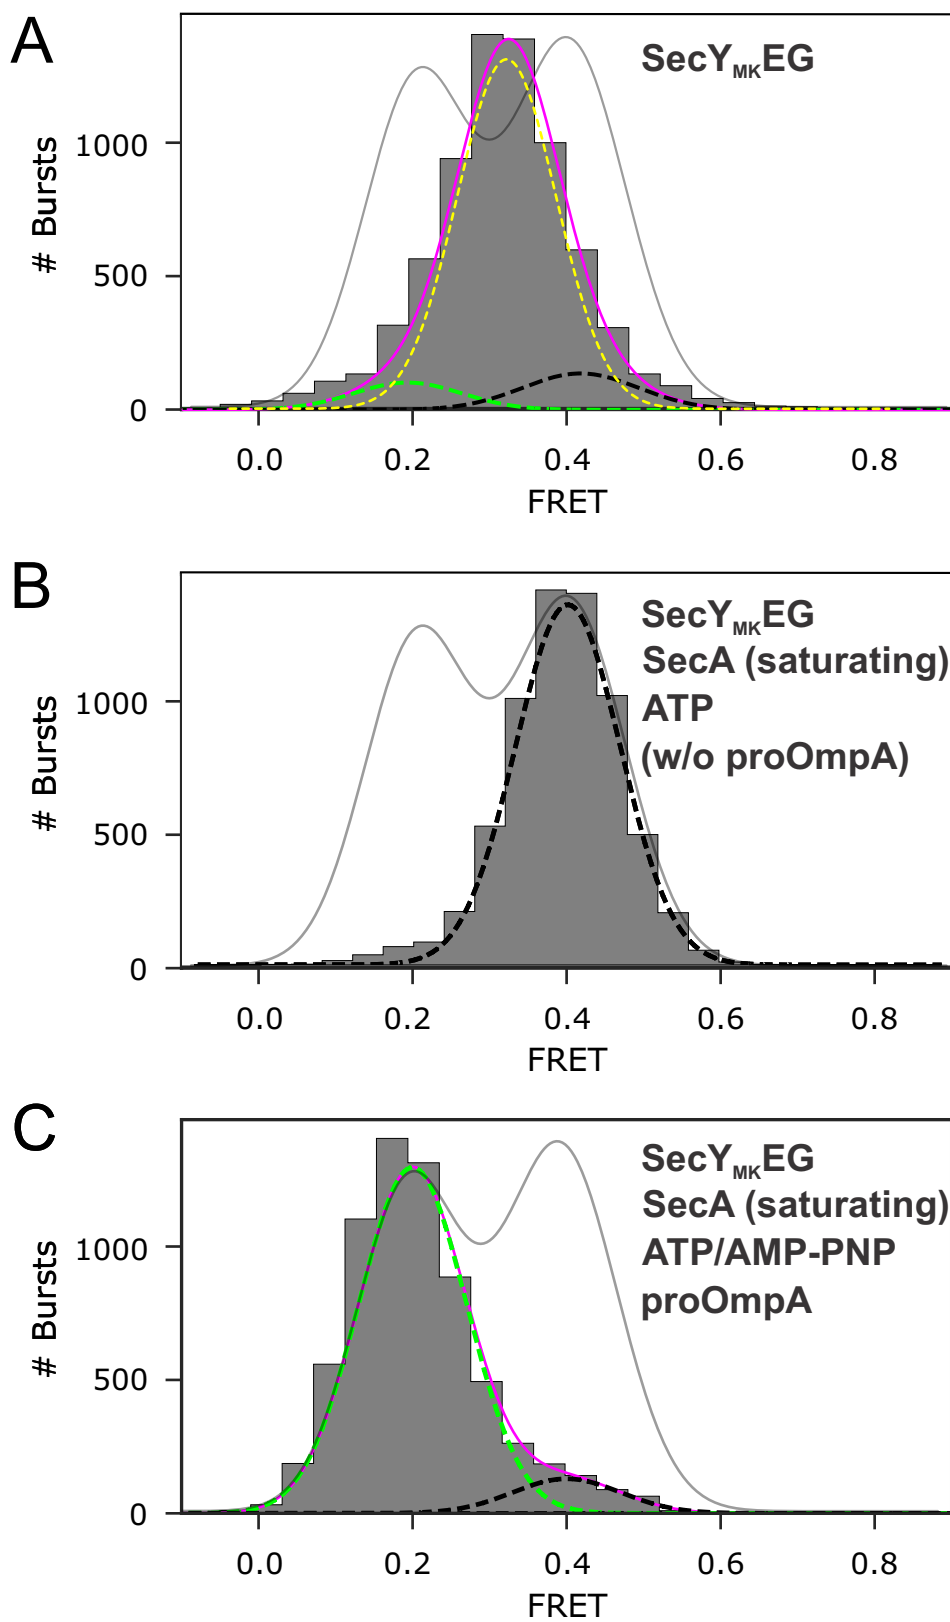

figure 2 - figure supplement 1

Supplement: supp [file elife_poa_e35112_Figure_2_figure_supplement_1.pdf › elife_poa_e35112_Figure_2_figure_supplement_1.pdf]

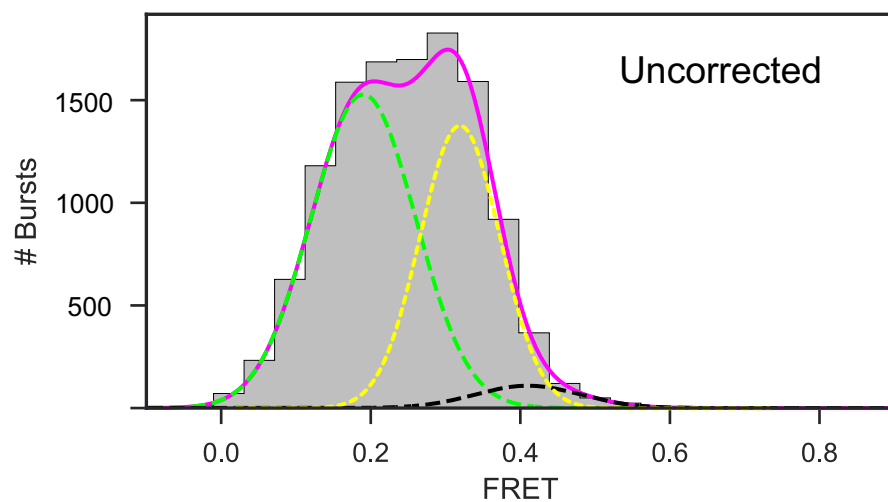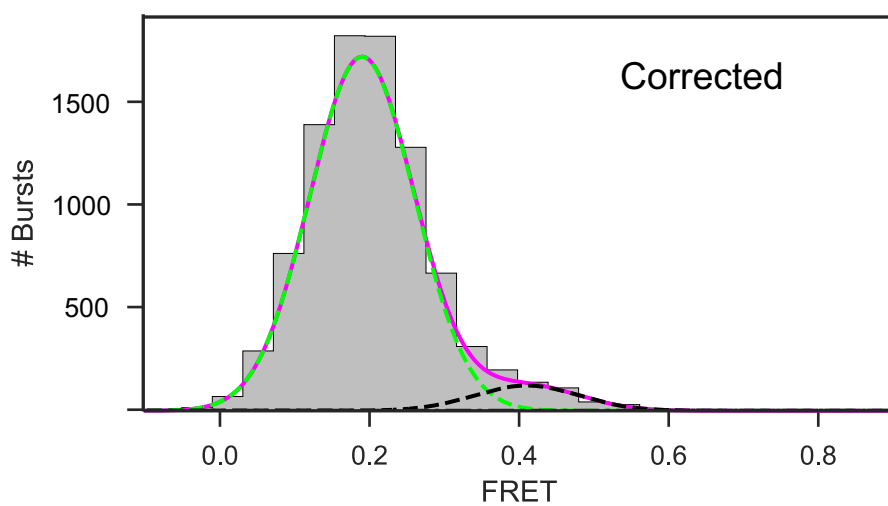

Figure 2 - figure supplement 2

Supplement: supp [file elife_poa_e35112_Figure_2_figure_supplement_2.pdf › elife_poa_e35112_Figure_2_figure_supplement_2.pdf]

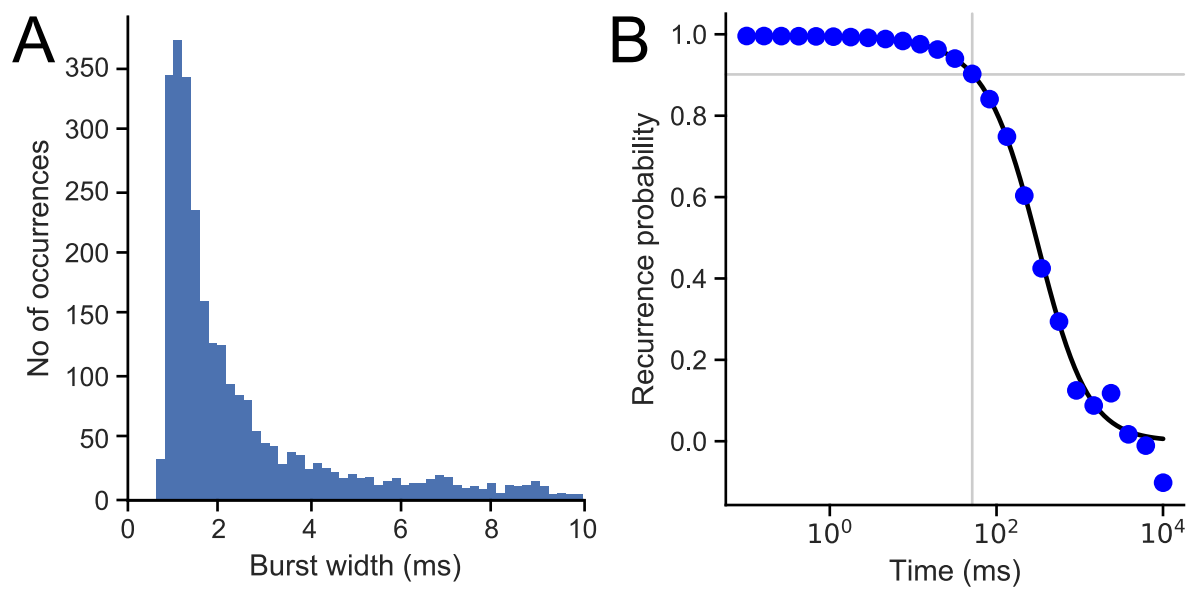

Figure 3 - figure supplement 1

Supplement: supp [file elife_poa_e35112_Figure_3_figure_supplement_1.pdf › elife_poa_e35112_Figure_3_figure_supplement_1.pdf]

SecY<sub>MK</sub>EG:SecA:SecB:pOA : 0.1 mM ATP  
(sub-saturating)

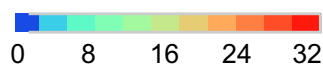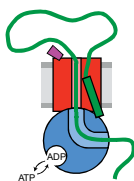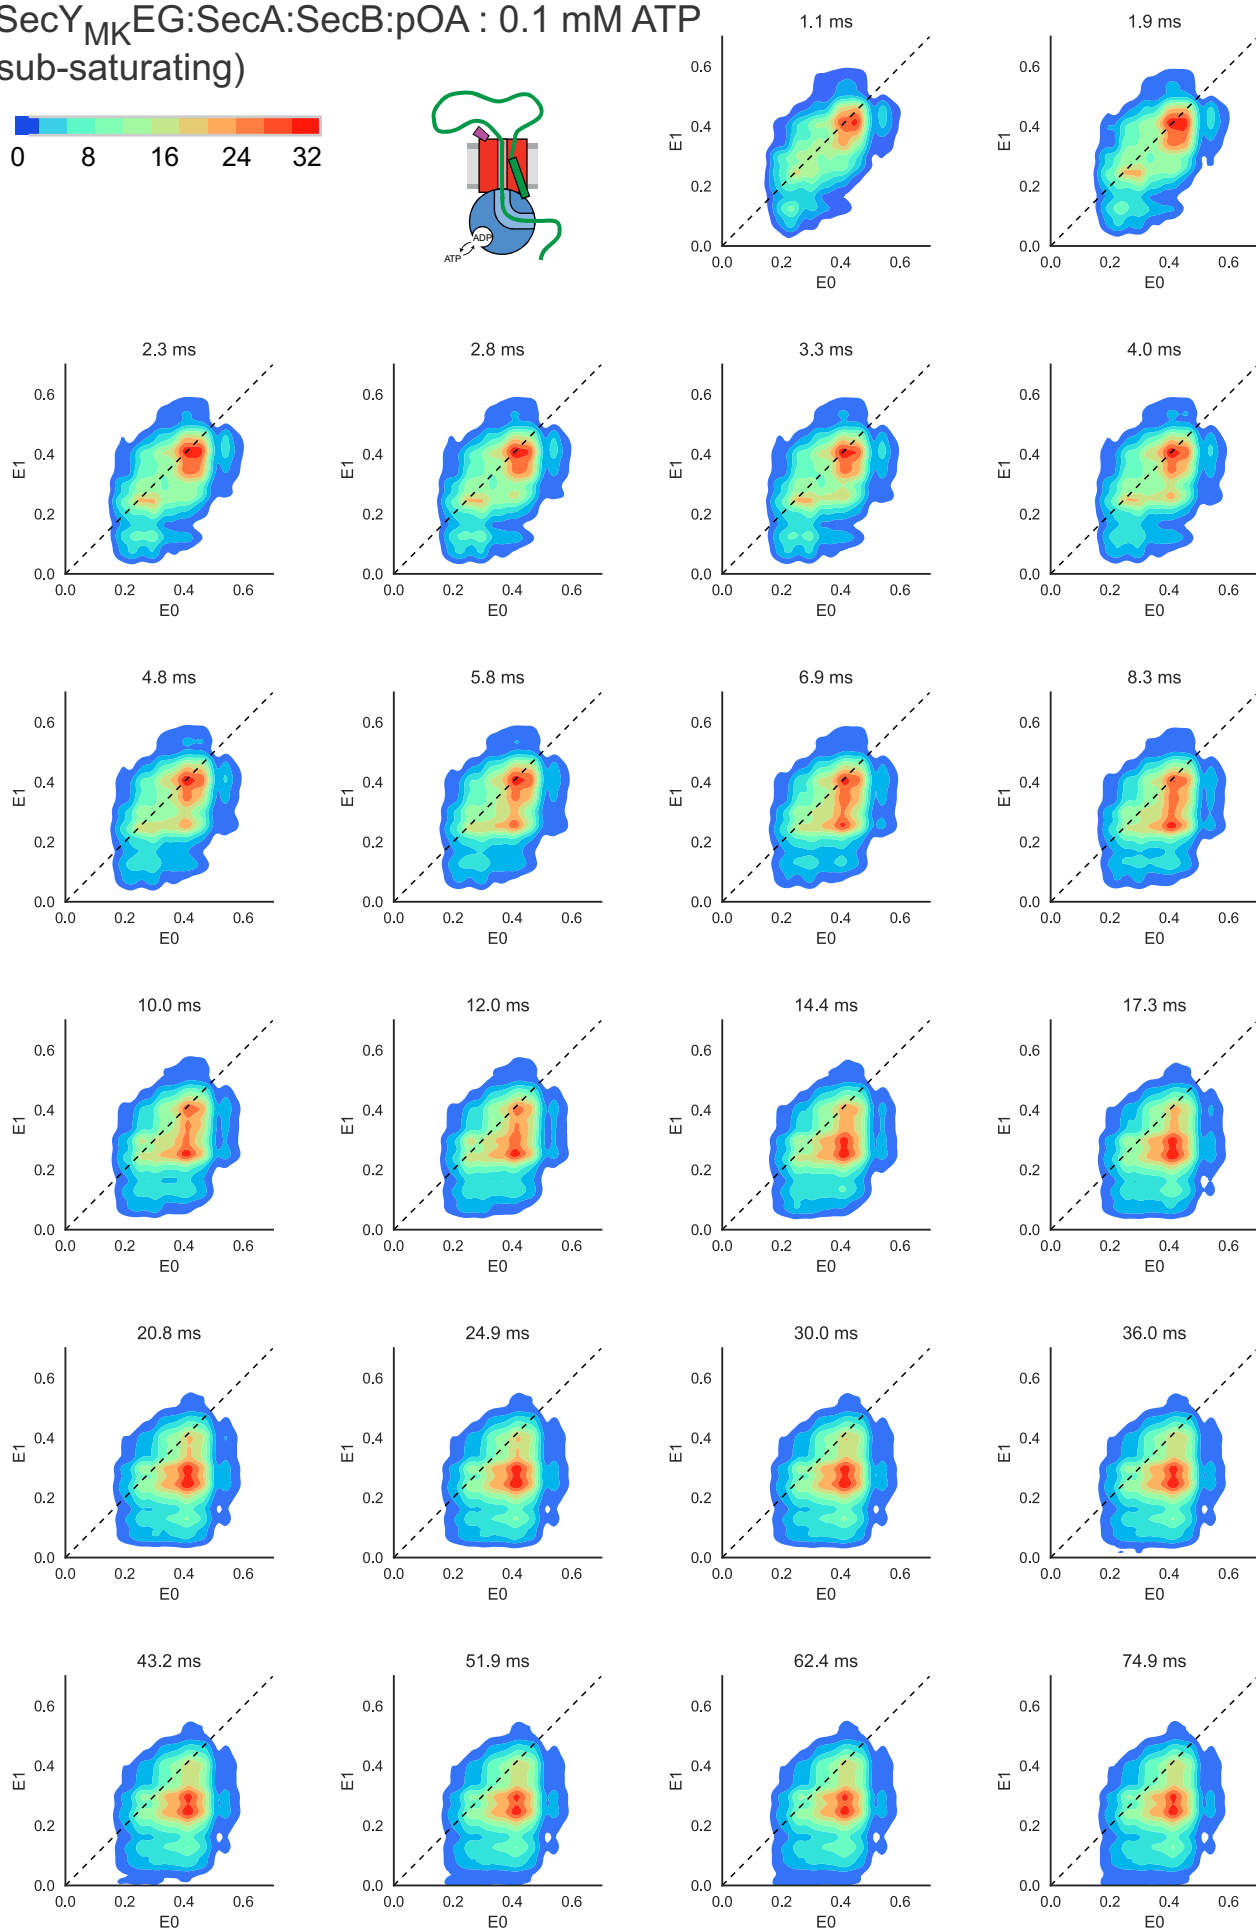

Figure 3 - figure supplement 2

Supplement: supp [file elife_poa_e35112_Figure_3_figure_supplement_2.pdf › elife_poa_e35112_Figure_3_figure_supplement_2.pdf]

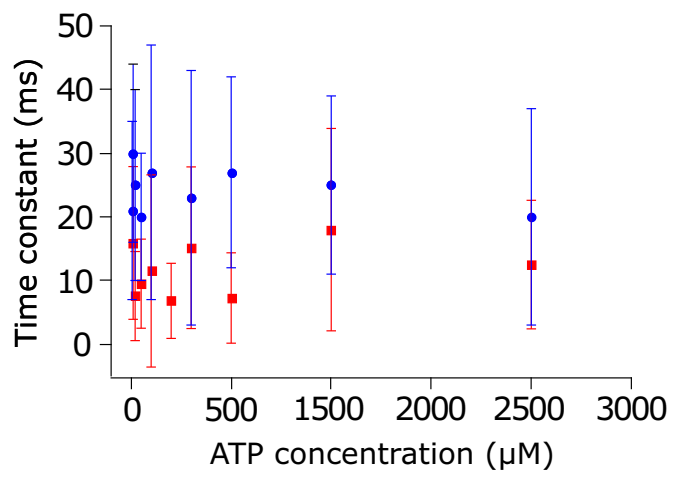

Figure 3 - figure supplement 3

Supplement: supp [file elife_poa_e35112_Figure_3_figure_supplement_3.pdf › elife_poa_e35112_Figure_3_figure_supplement_3.pdf]

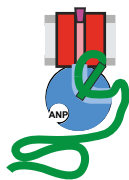

SecY<sub>MK</sub>EG:SecA:SecB:pOA: 1 mM AMP-PNP

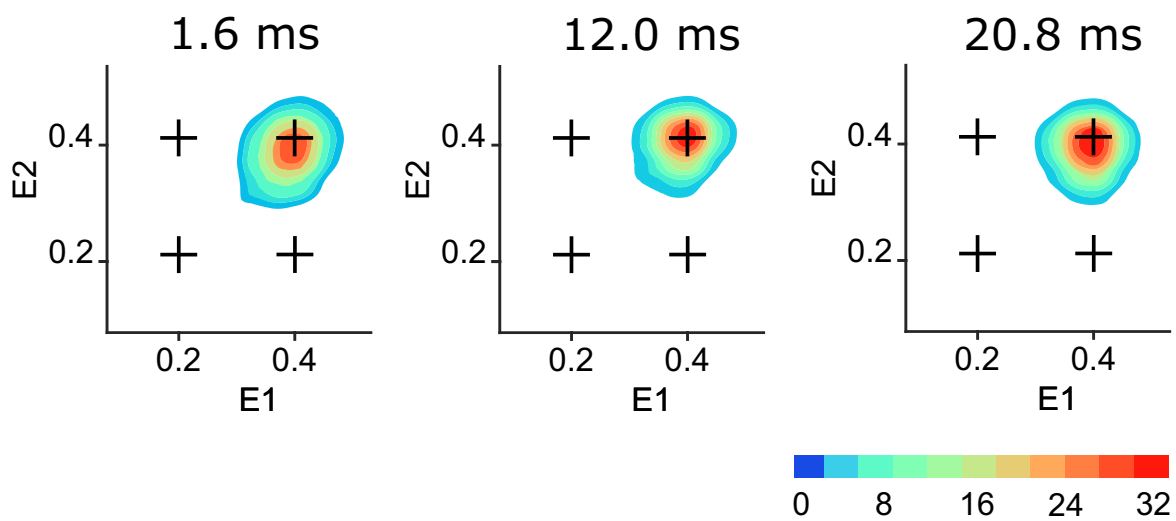

Figure 3 - figure supplement 4

Supplement: supp [file elife_poa_e35112_Figure_3_figure_supplement_4.pdf › elife_poa_e35112_Figure_3_figure_supplement_4.pdf]

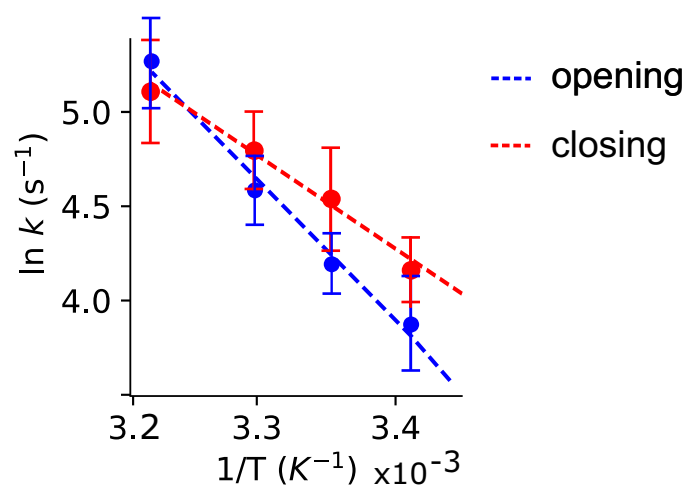

Figure 3 - figure supplement 5

Supplement: supp [file elife_poa_e35112_Figure_3_figure_supplement_5.pdf › elife_poa_e35112_Figure_3_figure_supplement_5.pdf]

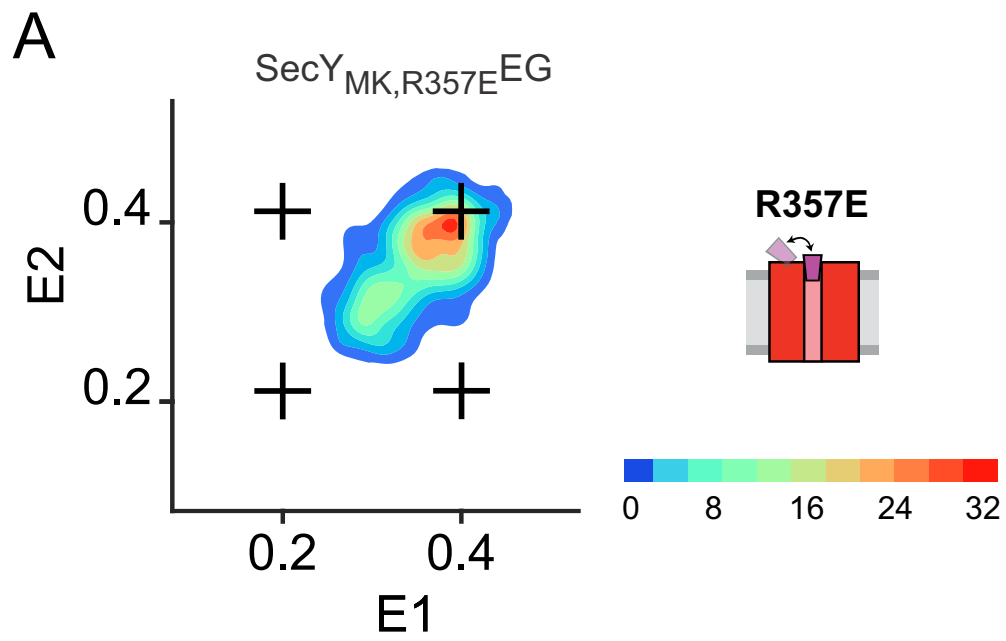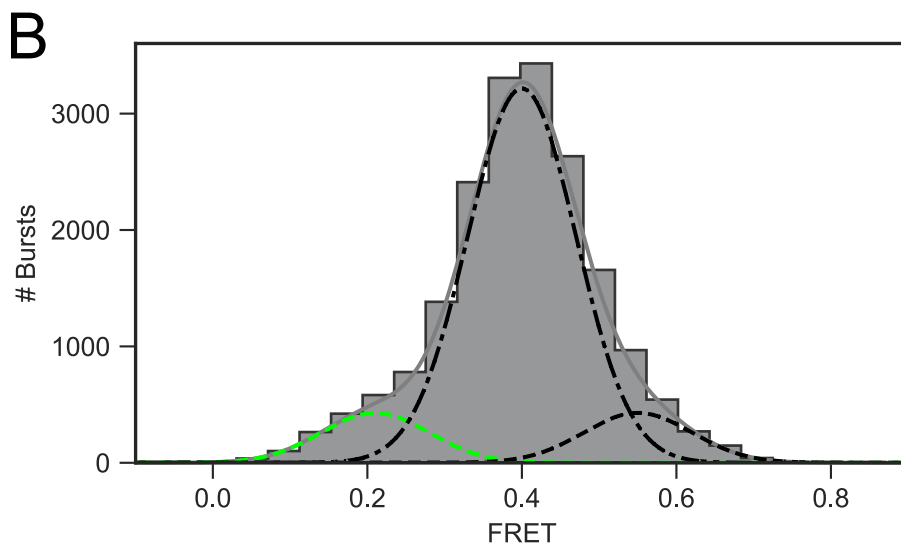

Figure 4 - figure supplement 1

Supplement: supp [file elife_poa_e35112_Figure_4_figure_supplement_1.pdf › elife_poa_e35112_Figure_4_figure_supplement_1.pdf]

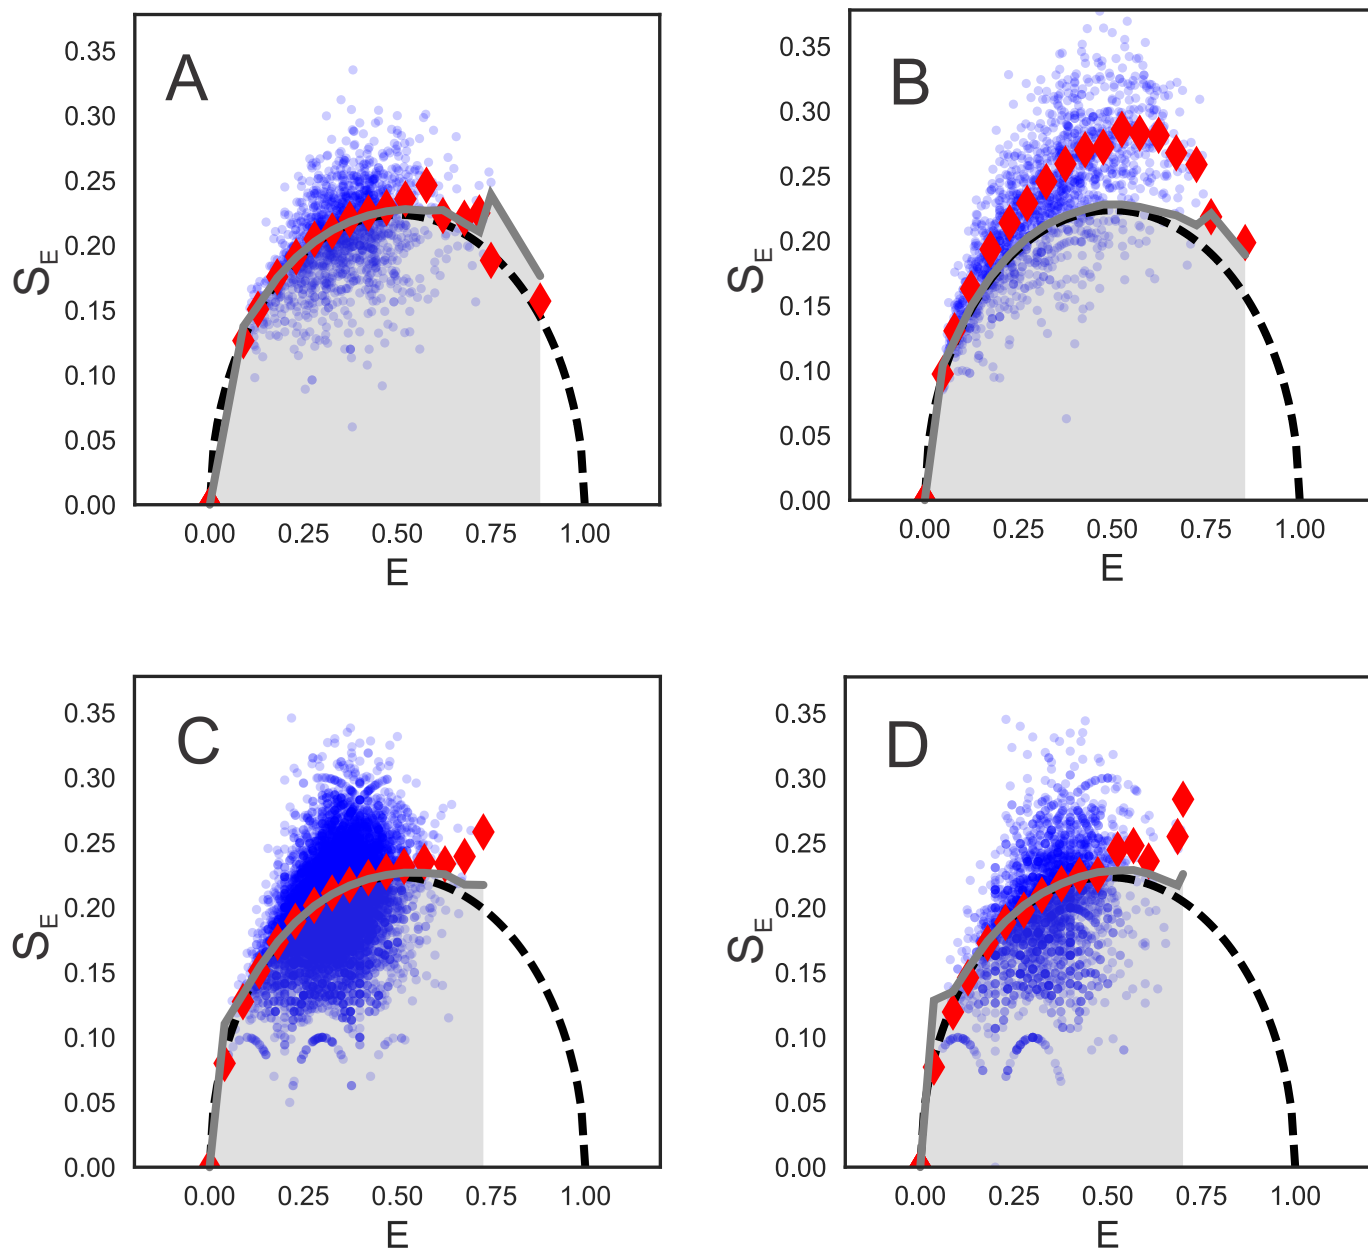

Figure 4 - figure supplement 2

Supplement: supp [file elife_poa_e35112_Figure_4_figure_supplement_2.pdf › elife_poa_e35112_Figure_4_figure_supplement_2.pdf]

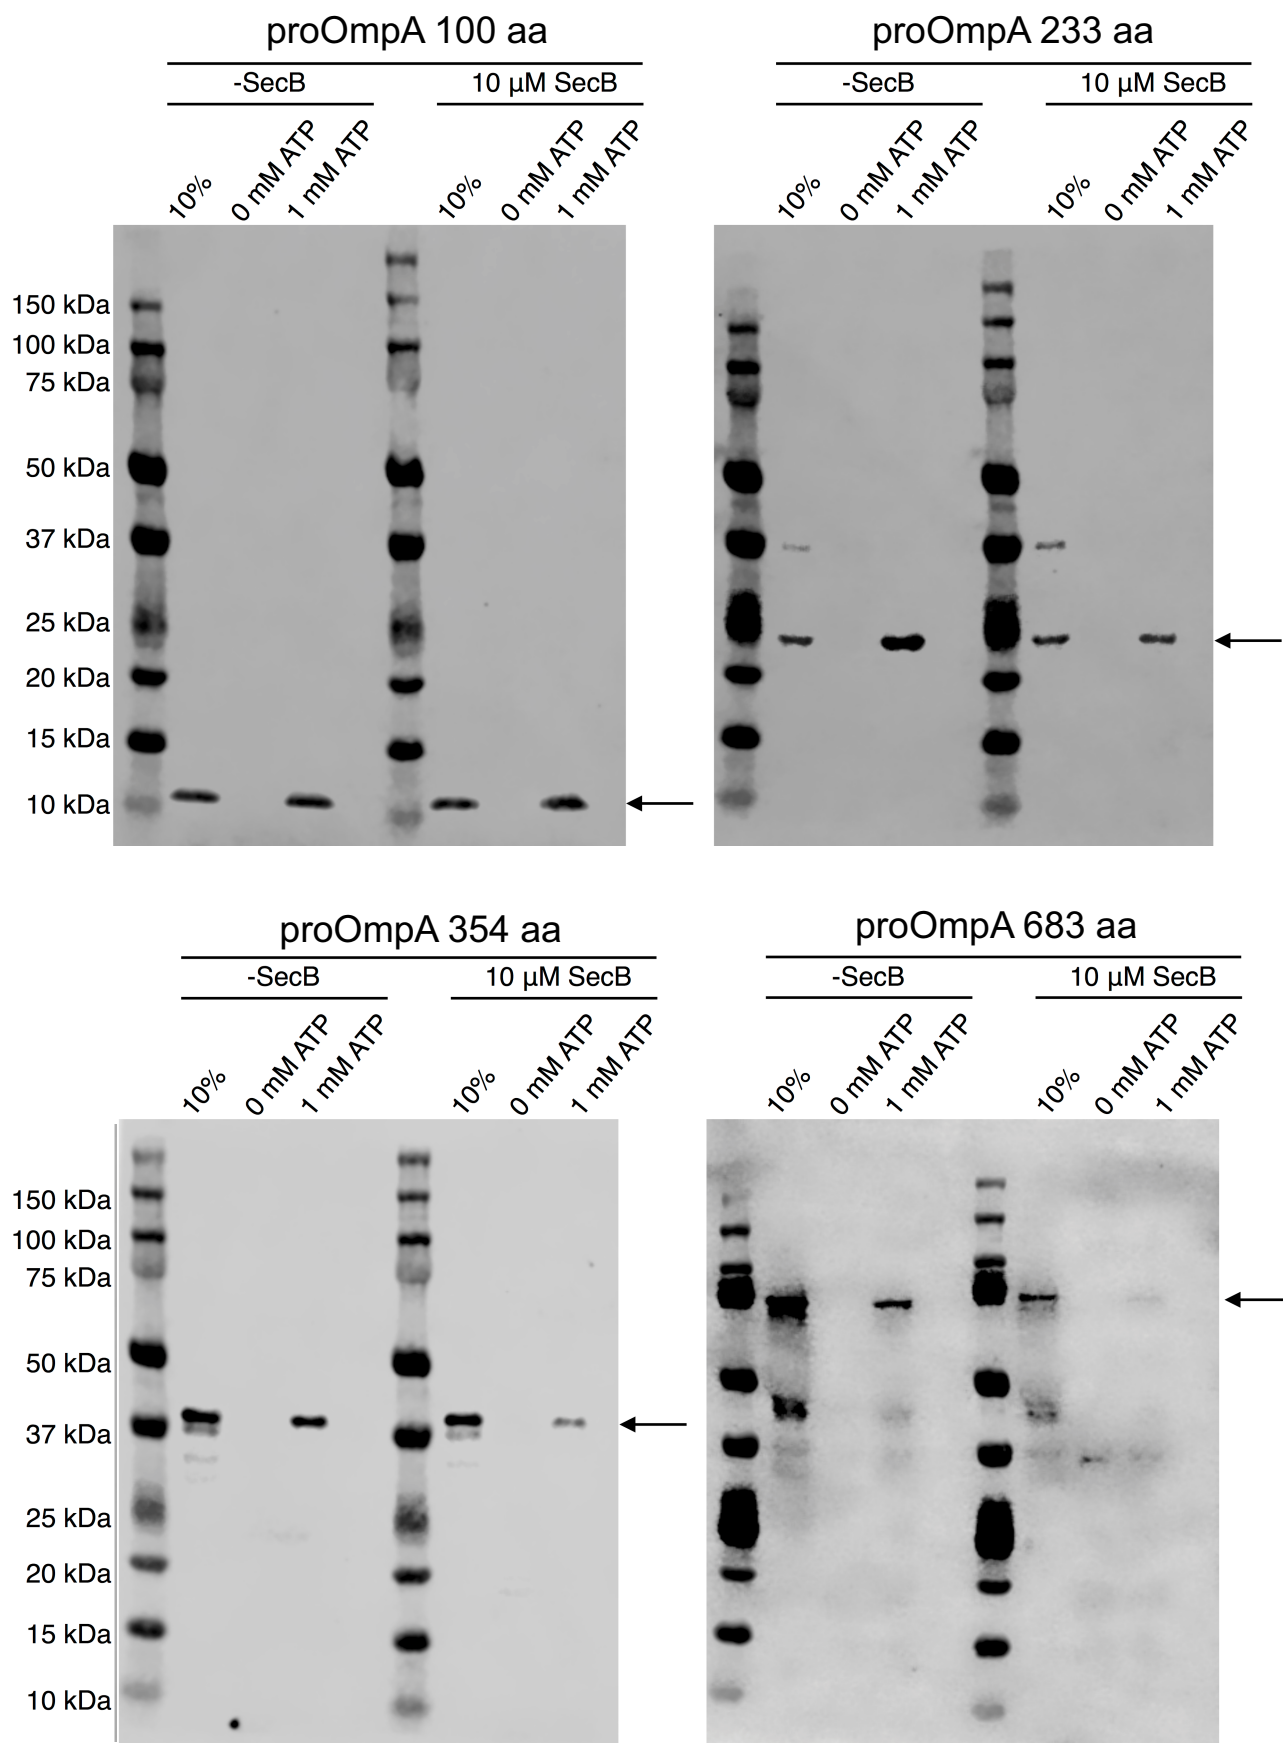

Figure 5 - figure supplement 1

Supplement: supp [file elife_poa_e35112_Figure_5_figure_supplement_1.pdf › elife_poa_e35112_Figure_5_figure_supplement_1.pdf]

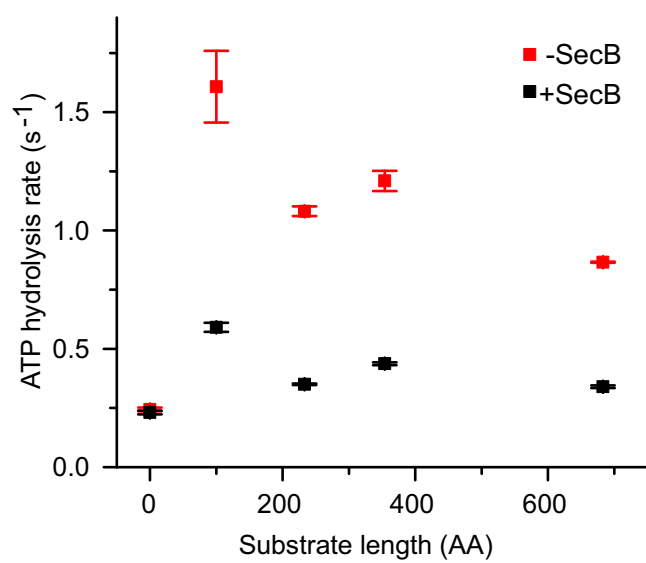

Figure 5 - figure supplement 2

Supplement: supp [file elife_poa_e35112_Figure_5_figure_supplement_2.pdf › elife_poa_e35112_Figure_5_figure_supplement_2.pdf]

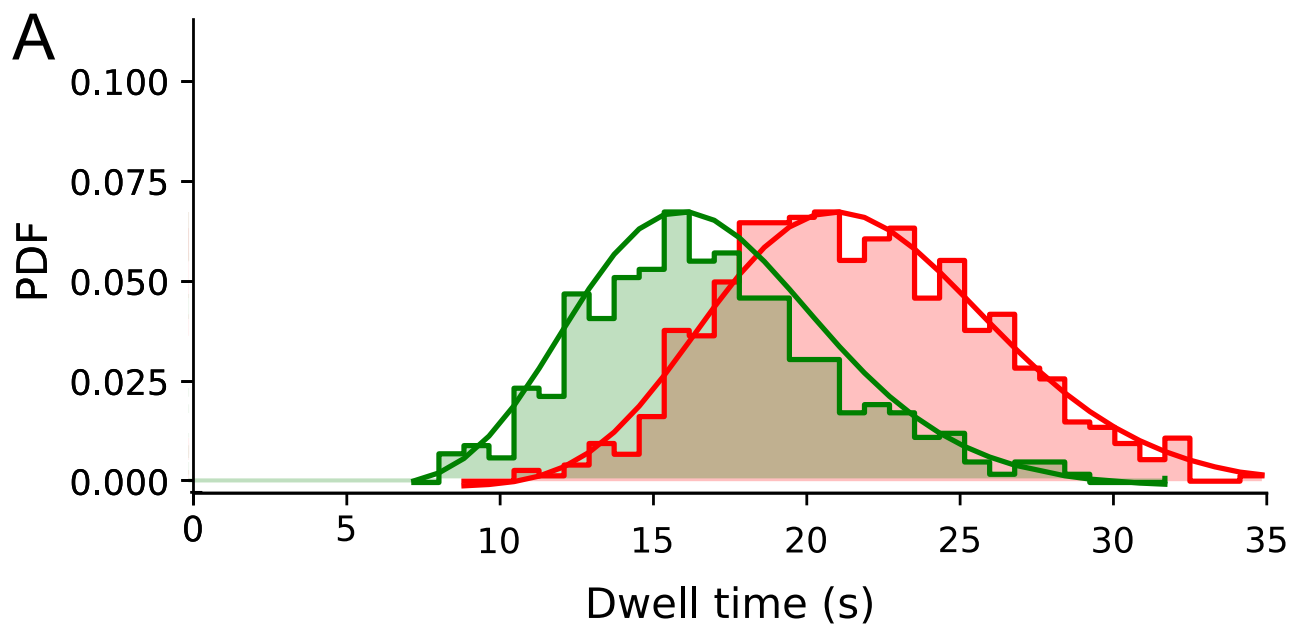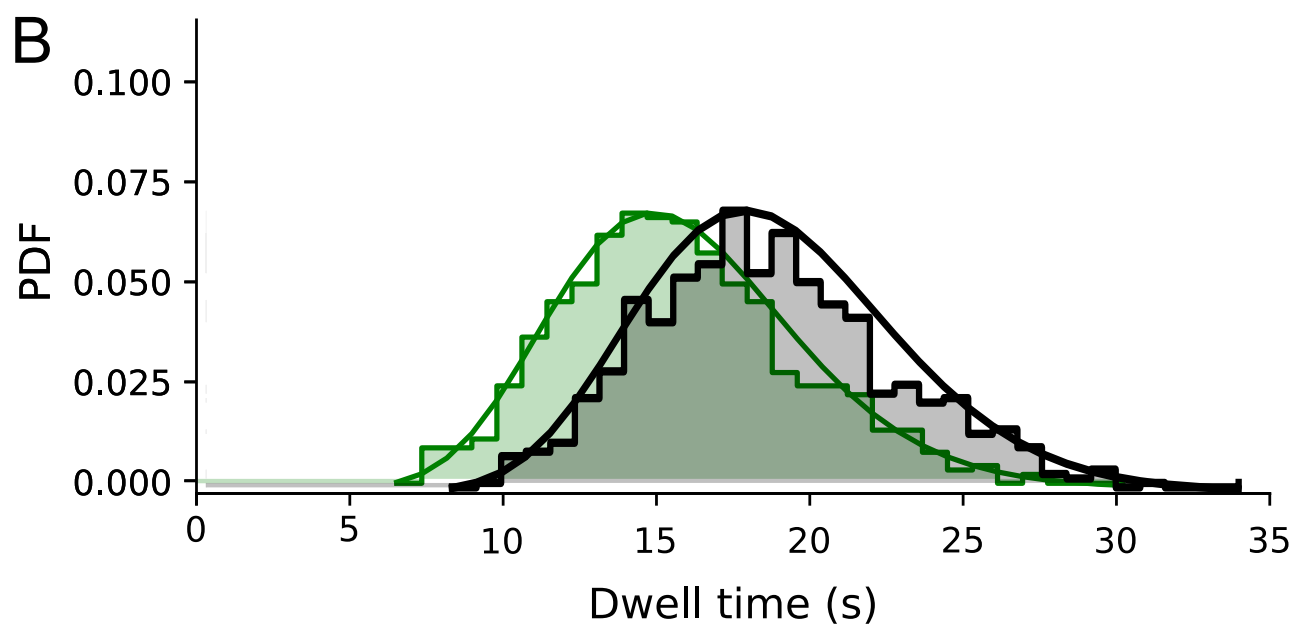

Figure 5 - figure supplement 3

Supplement: supp [file elife_poa_e35112_Figure_5_figure_supplement_3.pdf › elife_poa_e35112_Figure_5_figure_supplement_3.pdf]

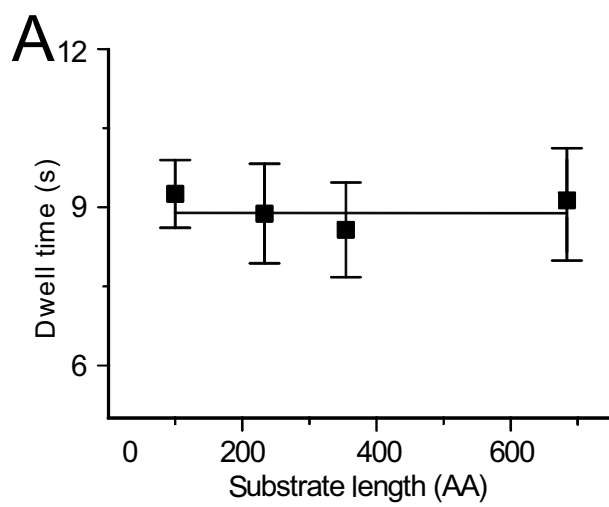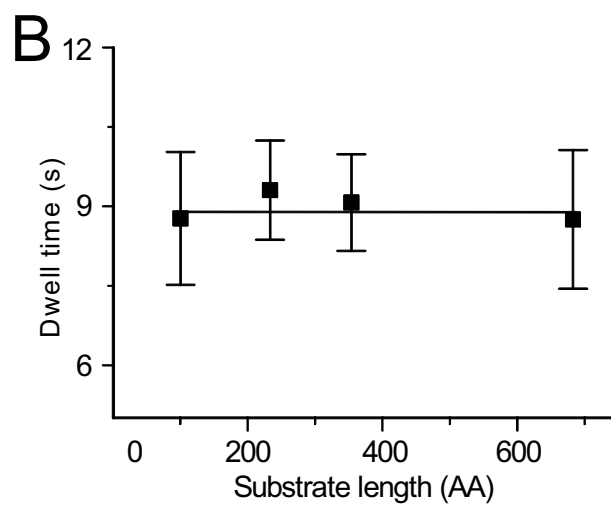

Figure 5 - figure supplement 4

Supplement: supp [file elife_poa_e35112_Figure_5_figure_supplement_4.pdf › elife_poa_e35112_Figure_5_figure_supplement_4.pdf]
